# Supplementary material for: Regulating the iodine adsorption performances of two- and three-component β-ketoenamine-linked covalent organic frameworks through tuning the proportion of monomers
Source: Royal Society of Chemistry journal article supplement (doi:10.1039/d3nj03699e), 2023-01-01
Supplement: d3nj03699e1.pdf [file d3nj03699e1.pdf]

[Electronic Supporting Information]

**Regulating the iodine adsorption performances of two- and three-component  $\beta$ -ketoenamine-linked covalent organic frameworks through tuning the proportion of monomers**

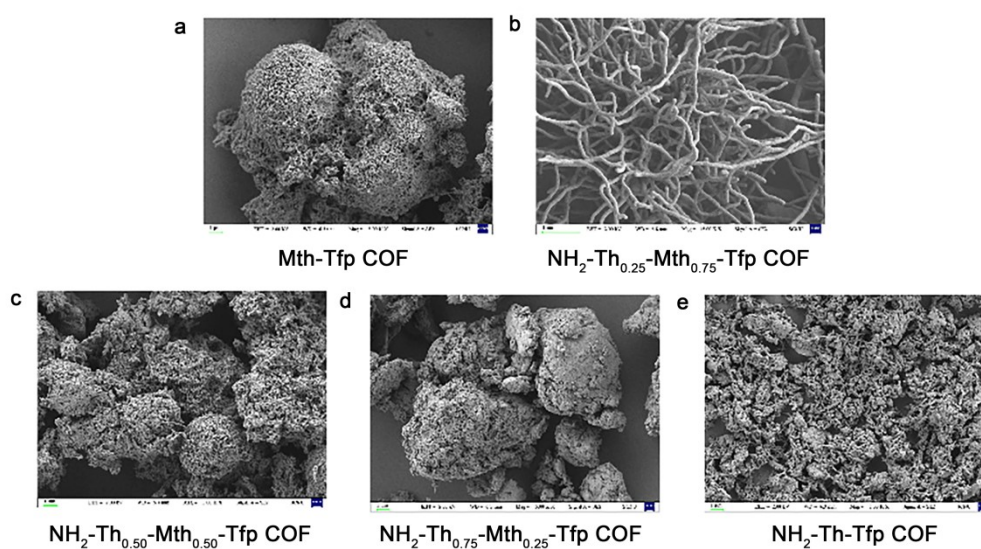

**Figure S1.** SEM images of  $\text{NH}_2\text{-Th}_x\text{-Mth}_{1-x}\text{-Tfp}$  COFs.

**Table S1.** Summary of iodine uptake capacity for typical porous adsorbents

| Adsorbents                                           | S <sub>BET</sub><br>(m <sup>2</sup> g <sup>-1</sup> )                   | Pore<br>size<br>(nm)   | Temperature<br>(°C) | Iodine<br>uptake<br>(g g <sup>-1</sup> ) | Adsorption<br>equilibriu<br>m time (h) | K <sub>80%</sub> (g<br>g <sup>-1</sup> h <sup>-1</sup> ) | Ref          |                      |
|------------------------------------------------------|-------------------------------------------------------------------------|------------------------|---------------------|------------------------------------------|----------------------------------------|----------------------------------------------------------|--------------|----------------------|
| COFs                                                 | ICOF-AB-50                                                              | 1390                   | 3.3                 | 75                                       | 10.21                                  | 30                                                       | 1.195        | [S1]                 |
|                                                      | COF-TAPT                                                                | 2348                   | 1.92                | 75                                       | 8.61                                   | 96                                                       | 0.48         | [S2]                 |
|                                                      | TPB-DMTP COF                                                            | 1927                   | 3.3                 | 75                                       | 6.26                                   | 96                                                       | 0.13         | [S3]                 |
|                                                      | Tfp-DB COF,<br>Tfp-BD COF                                               | 158.35,<br>138.01      | 1.0-33<br>2.8       | 75                                       | 5.82,<br>5.42                          | 72                                                       | -            | [S4]                 |
|                                                      | T-COF-2, T-COF-1                                                        | 781,<br>62.3           | 2.5                 | 75                                       | 4.72,<br>4.29                          | 24                                                       | -            | [S5]                 |
|                                                      | OM-COF-300                                                              | 1410                   | 0.5                 | 75                                       | 3.15                                   | 36                                                       | 0.30         | [S6]                 |
|                                                      | NH <sub>2</sub> -Th-Bta COF                                             | 10                     | 2.5                 | 75                                       | 3.58                                   | 37                                                       | -            | [S7]                 |
|                                                      | <b>NH<sub>2</sub>-Th<sub>0.25</sub>-Mth<sub>0.75</sub>-<br/>Tfp COF</b> | <b>688.2</b>           | <b>1.6</b>          | <b>80</b>                                | <b>2.30</b>                            | <b>32</b>                                                | <b>0.125</b> | <b>This<br/>work</b> |
|                                                      | HEDAN                                                                   | 1155                   | 2.19                | 75                                       | 2.25                                   | 36                                                       | -            | [S8]                 |
|                                                      | Hz-COF                                                                  | 145                    | 2.16                | 80                                       | 2.05                                   | 70                                                       | -            | [S9]                 |
|                                                      | N <sub>3</sub> -COF                                                     | 1240                   | -                   | 75                                       | 1.95                                   | -                                                        | -            | [S10]                |
|                                                      | COF-TpgBD<br>COF-TpgTd                                                  | 217.9,<br>304          | 8.3,<br>9.9         | 75                                       | 1.81,<br>1.66                          | 50                                                       | -            | [S11]                |
|                                                      | sp <sup>2</sup> c-TFPA-pXD<br>COF                                       | 267                    | 2.7                 | 77                                       | 1.22                                   | 5                                                        | -            | [S12]                |
|                                                      | Th-Bta COF                                                              | 22                     | 2.6                 | 75                                       | 0.68                                   | 11                                                       | -            | [S7]                 |
|                                                      | MOFs                                                                    | MIL-101-ED,<br>MIL-101 | 1238.7,<br>1728.3   | -                                        | 80                                     | 4.37,<br>2.67                                            | 24           | -                    |
| medi-MOF-1                                           |                                                                         | 0.0347                 | -                   | 25                                       | 1.94                                   | 13                                                       | -            | [S14]                |
| HKUST-1 MOF                                          |                                                                         | 1798                   | -                   | 75                                       | 1.50                                   | -                                                        | -            | [S15]                |
| ZIF-8 MOF                                            |                                                                         | 1875                   | -                   | 75                                       | 1.20                                   | -                                                        | -            | [S15]                |
| [Cd <sub>2</sub> (COO) <sub>4</sub> N <sub>4</sub> ] |                                                                         | 1105                   | 1.05                | 50                                       | 0.66                                   | -                                                        | -            | [S16]                |
| UIO-66 MOF                                           |                                                                         | 1072                   | 0.6                 | 80                                       | 0.66                                   | -                                                        | -            | [S17]                |
| Other<br>porous<br>materials                         |                                                                         | 3Ph-CTF                | 33                  | -                                        | 70                                     | 2.50                                                     | 33           | -                    |
|                                                      | BN foam                                                                 | 561                    | 2.6                 | 77                                       | 2.12                                   | -                                                        | -            | [S19]                |
|                                                      | CMPN-3                                                                  | 1368                   | 6.9                 | 70                                       | 2.08                                   | 1                                                        | -            | [S20]                |
|                                                      | NiP-CMP                                                                 | 2630                   | 1.25                | 77                                       | 2.02                                   | 24                                                       | -            | [S21]                |

|                                       |      |   |    |      |    |   |       |
|---------------------------------------|------|---|----|------|----|---|-------|
| NTP                                   | 1067 | - | 75 | 1.80 | 48 | - | [S22] |
| Activated carbon                      | -    | - | 75 | 0.30 | -  | - | [S22] |
| Ag <sup>+</sup> @Zeolite<br>mordenite | -    | - | 95 | 0.28 | -  | - | [S23] |

## References

- [S1] Y. Xie, T. Pan, Q. Lei, C. Chen, X. Dong, Y. Yuan, J. Shen, Y. Cai, C. Zhou, I. Pinnau and Y. Han, *Angew. Chem. Int. Ed.*, 2021, 60, 22432-22440.
- [S2] Y. Xie, T. Pan, Q. Lei, C. Chen, X. Dong, Y. Yuan, W.A. Maksoud, L. Zhao, L. Cavallo, I. Pinnau and Y. Han, *Nat. Commun.*, 2022, 13, 2878.
- [S3] P. Wang, Q. Xu, Z.-P. Li, W.-M. Jiang, Q.-H. Jiang and D.-L. Jiang, *Adv. Mater.*, 2018, 30, 1991.
- [S4] S. Song, Y. Shi, N. Liu and F.-Q. Liu, *RSC Adv.*, 2021, 11, 10512-10523.
- [S5] Q. Niu, Q. Cui, X. Meng, P. Zhang, Y. Zhou, H. Fu, B. Ma, N. Qin and L. Zhai, *New J. Chem.*, 2023, 67, 7642.
- [S6] T. Liu, Y. Zhao, M. Song, X.-H. Pang, X.-F. Shi, J.-J. Jia, L.-F. Chi and G. Lu, *J. Am. Chem. Soc.*, 2023, 145, 4, 2544-2552.
- [S7] S.-Y. Zhang, X.-H. Tang, Y.-L. Yan, S.-Q. Li, S. Zheng, J. Fan, X. Li, W.-G. Zhang and S.-L. Cai, *ACS Macro. Lett.*, 2021, 10, 1590-1596.
- [S8] Y.-X. Zhang, *Micropor. Mesopor. Mater.*, 2023, 353, 112517.
- [S9] N. Mokhtari, M. Dinari, *Sep. Purif. Technol.*, 2022, 301, 121948.
- [S10] V.-S. Vyas, F. Haase, L. Stegbauer, G. Savasci, F. Podjaski, C. Ochsenfeld and B.V. Lotsch, *Nat. Commun.*, 2015, 6, 8508.
- [S11] Y.-H. Sun, S. Song, D.-H. Xiao, L.-F. Gan and Y.-H. Wang, *ACS Omega*, 2020, 5, 24262-24271
- [S12] G.-Q. Yu, Y.-Y. Liu, X.-J. Yang, Y.-R. Li, Y.-Q. Li, Y.-B. Zhang and C.-Y. He, *Sep. Purif. Technol.*, 2023, 312, 123401.

- [S13] P. Tang, X.-X. Xie, Z.-Y. Huang, X.-T. Cai, W.-G. Zhang, S.-L. Cai, J. Fan and S.-R. Zheng, *J. Solid State. Chem.*, 2022, 315, 123453.
- [S14] H.-M. Su, Y. Zhou, T. Huang and F.-X. Sun, *Molecules*, 2023, 28, 5237.
- [S15] D. F. Sava, T. J. Garino and T. M. Nenoff, *Ind. Eng. Chem. Res.*, 2012, 51, 614.
- [S16] B.-B. Shi, R.-Z. Pei, A.-W. Chen, C. Wang, Y.-M. Ma and Z. Yin, *Inorg. Chem. Commun.*, 2019, 102, 147.
- [S17] P. Chen, X.-H. He, M.-B. Pang, X.-T. Dong, S. Zhao and W. Zhang, *ACS Appl. Mater. Interfaces*, 2020, 12, 20429-20439.
- [S18] M.-S. Zhang, Y. Liu, Y.-J. Du and H.-Z. Liu, *ACS Appl. Nano Mater.*, 2023, 6, 13874-13884.
- [S19] G. Li, Y. Huang, J. Lin, C. Yu, Z.-Y. Liu, Y. Fang, Y.-M. Xue and C.-C. Tang, *Chem. Eng. J.*, 2020, 382, 122833.
- [S20] Y.-F. Chen, H.-X. Sun, R.-X. Yang, T.-T. Wang, C.-J. Pei, Z.-T. Xiang, Z.-Q. Zhu, W.-D. Liang, A. Li and W.-Q. Deng, *J. Mater. Chem.*, 2015, 3, 87.
- [S21] A. Sigen. Y.-W. Zhang, Z.-P. Li, H. Xia, M. Xue, X.-M. Liu and Y. Mu, *Chem. Commun.*, 2014, 50, 8495.
- [S22] H. Ma, J.-J. Chen, L.-X. Tan, J.-H. Bu, Y.-H. Zhu, B. Tan and C. Zhang, *ACS Macro. Lett.*, 2016, 5, 1039.
- [S23] K. W. Chapman, P. J. Chupas and T. M. Nenoff, *J. Am. Chem. Soc.*, 2010, 132, 8897.
